# Supplementary material for: Pan-cancer quantitation of epithelial-mesenchymal transition dynamics using parallel reaction monitoring-based targeted proteomics approach
Source: Springer Nature journal article supplement (doi:10.1186/s12967-021-03227-0), 2022-02-11
Supplement: MOESM1 [file 20126212]

Supplementary Fig. 2 PRM transitions for 31 peptides precursors selected for analysis of 31 proteins mentioned in the figures across the cell lines

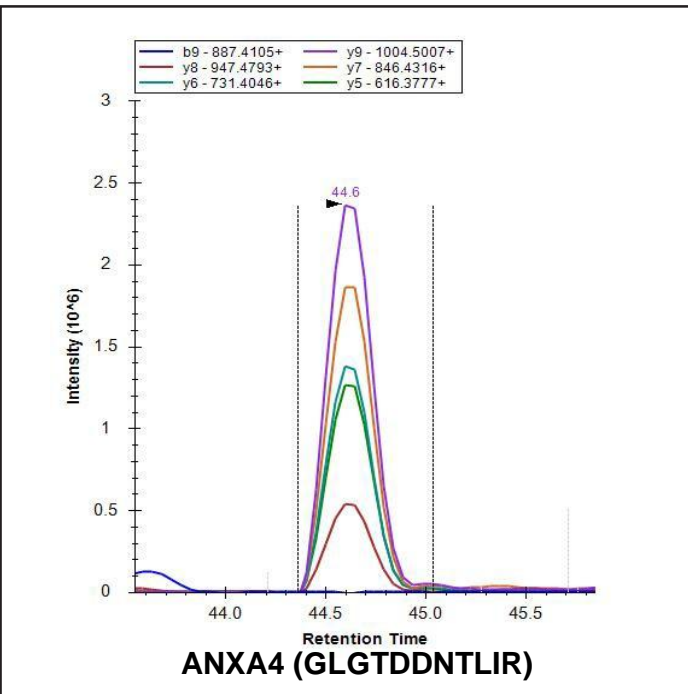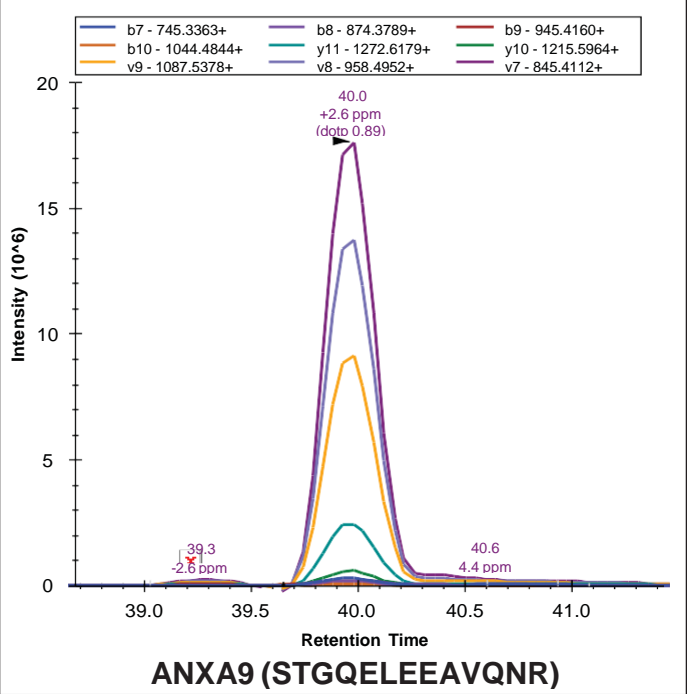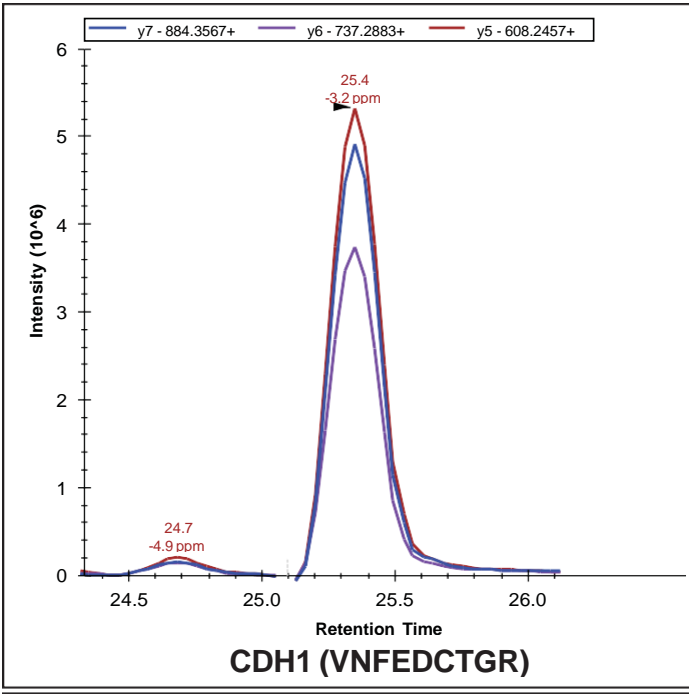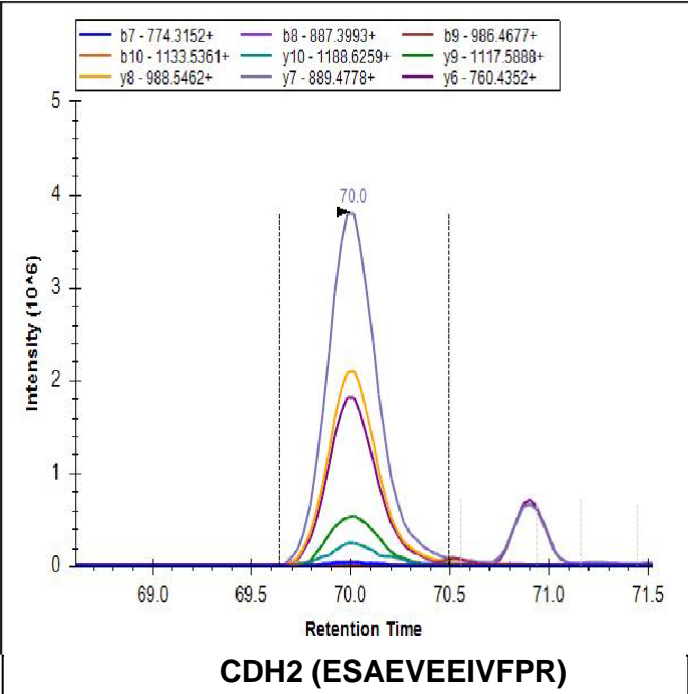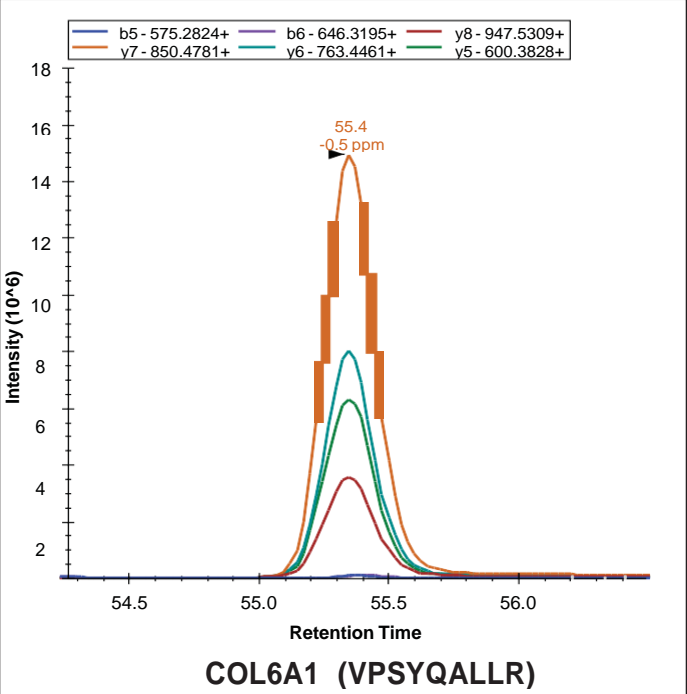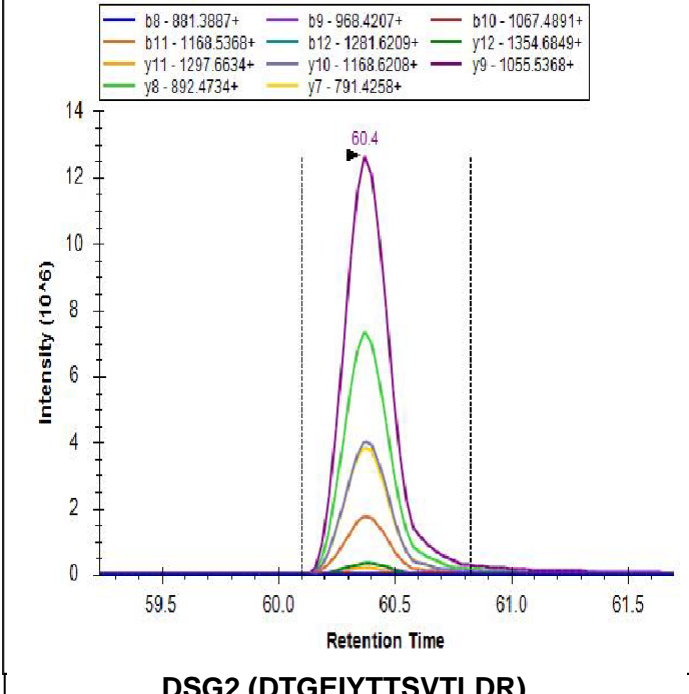

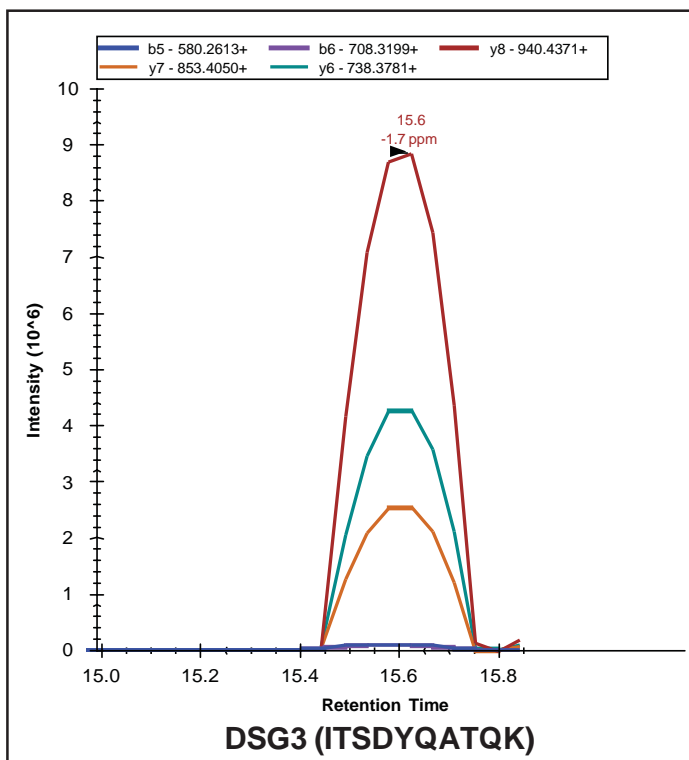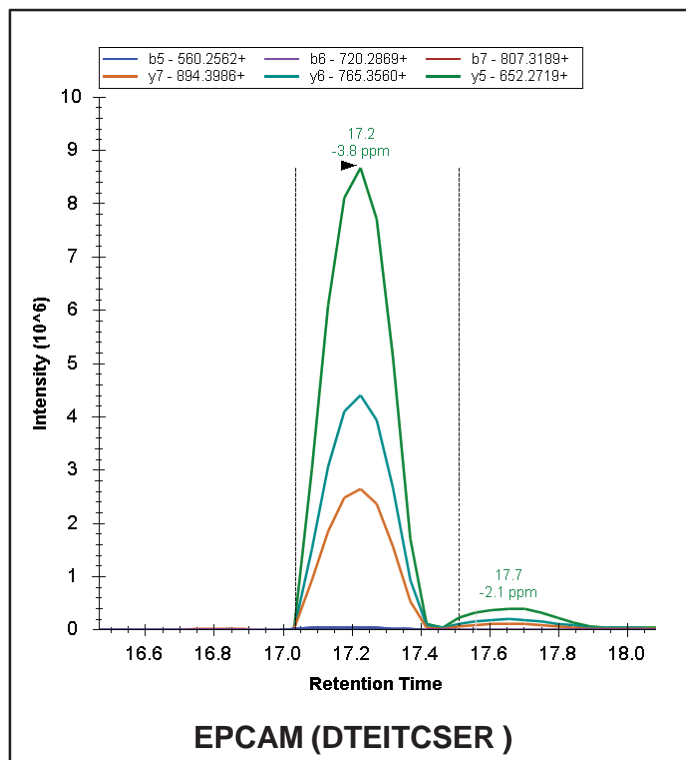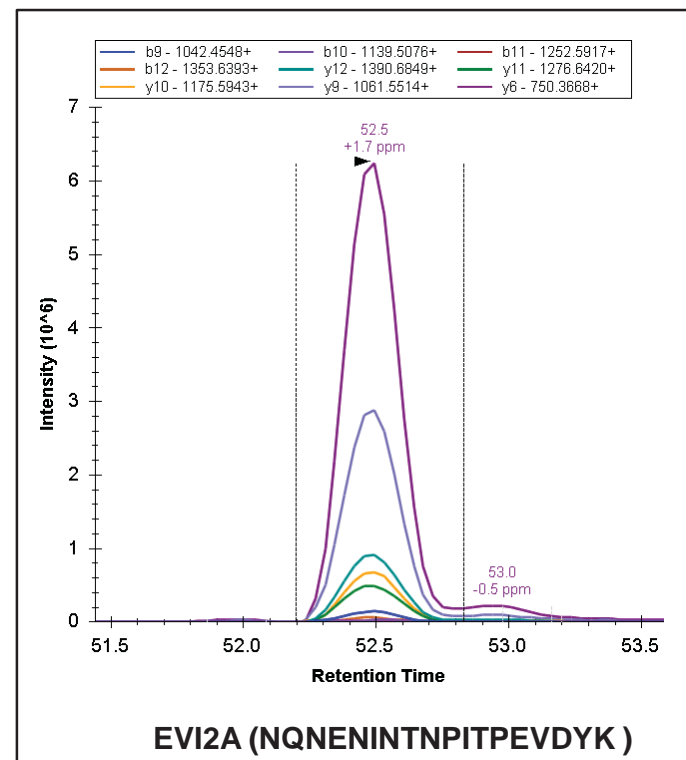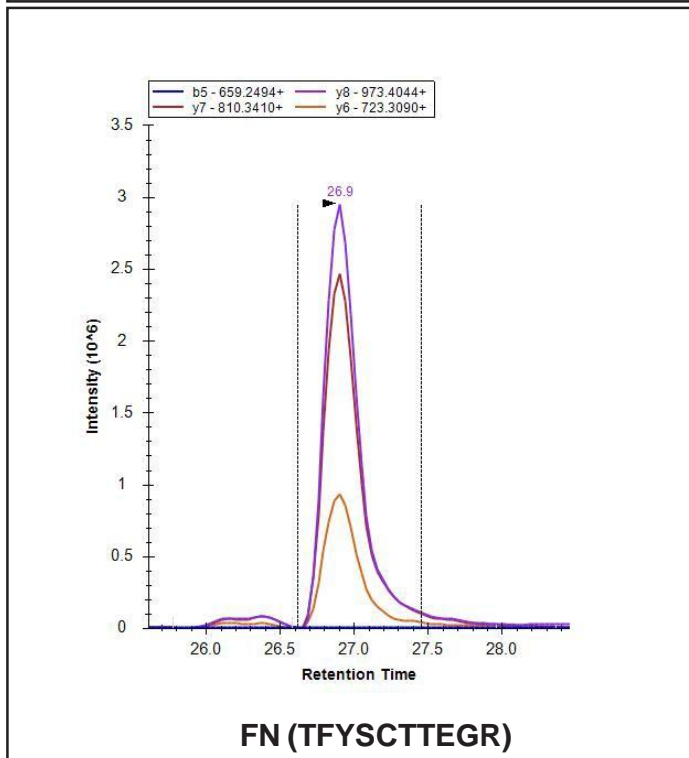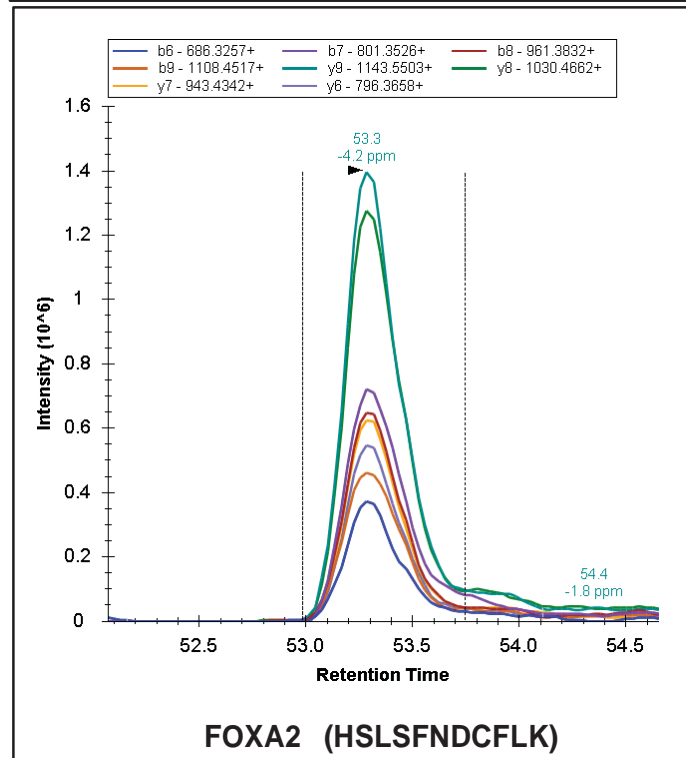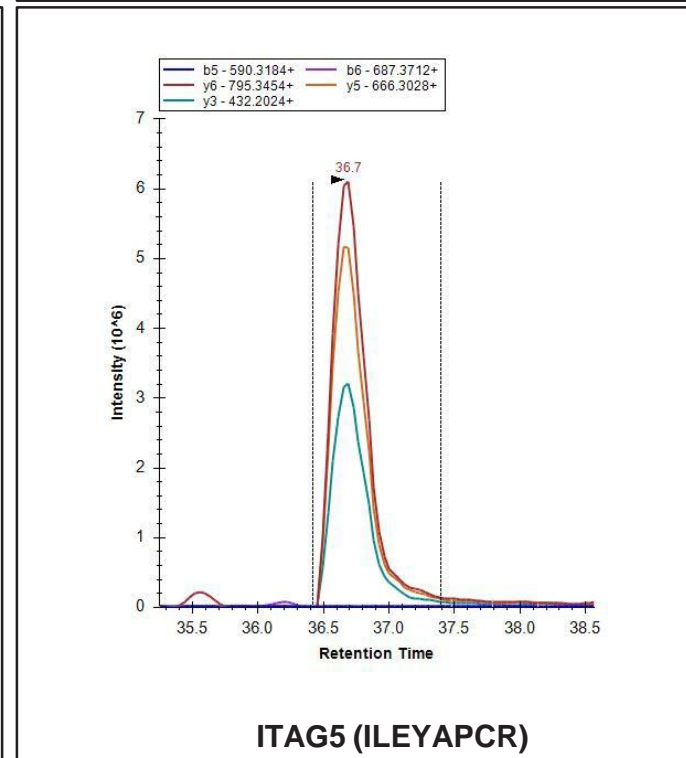

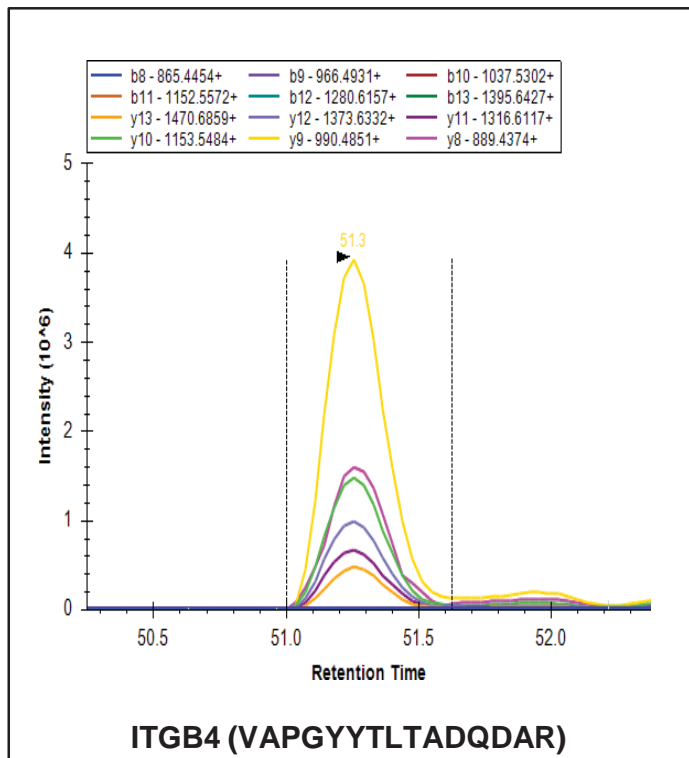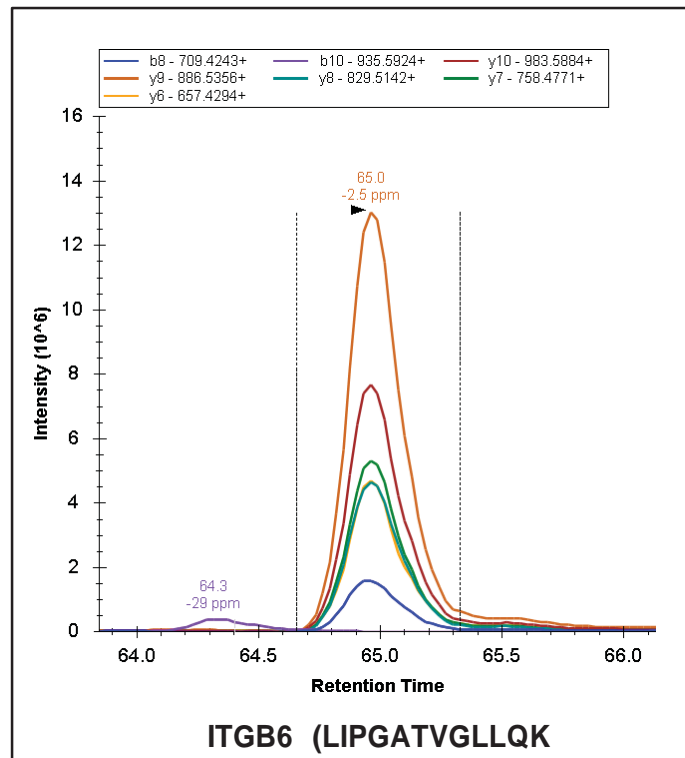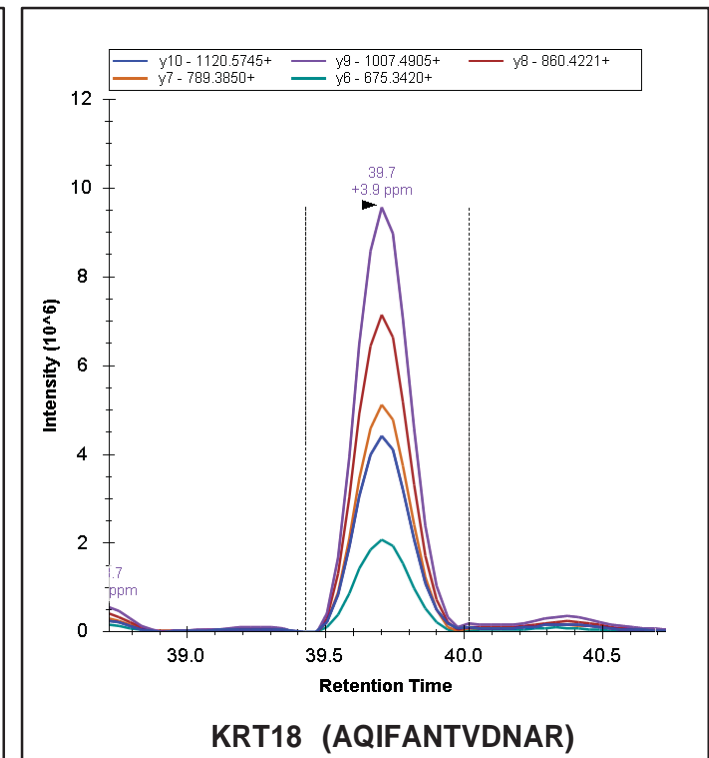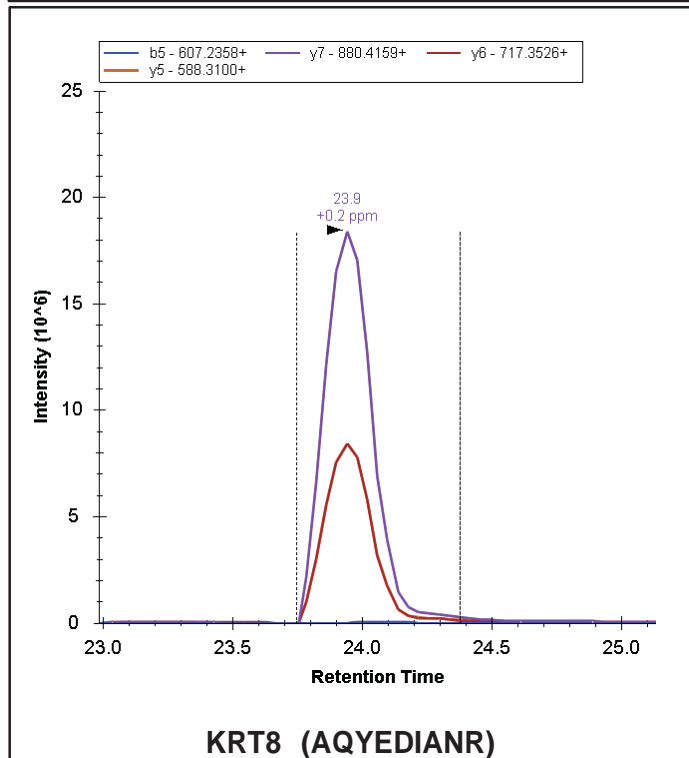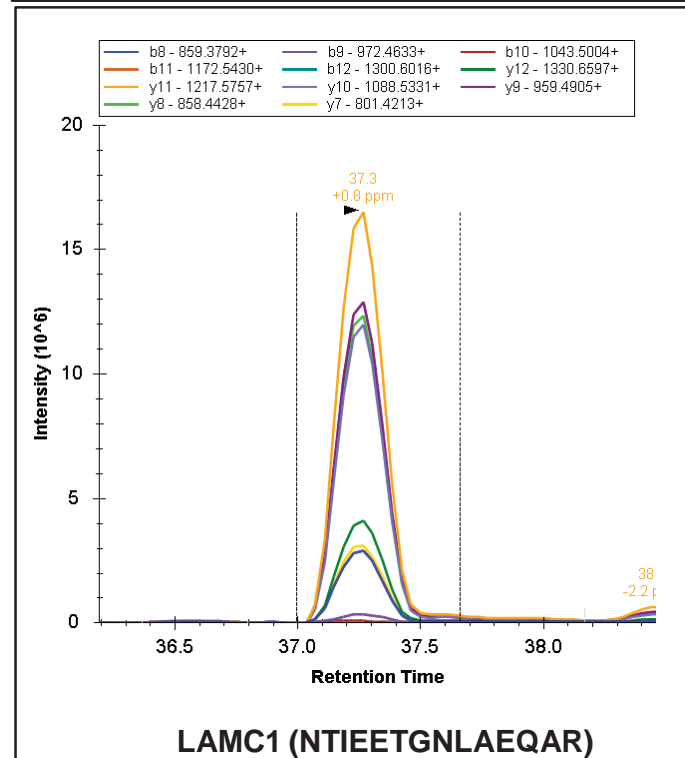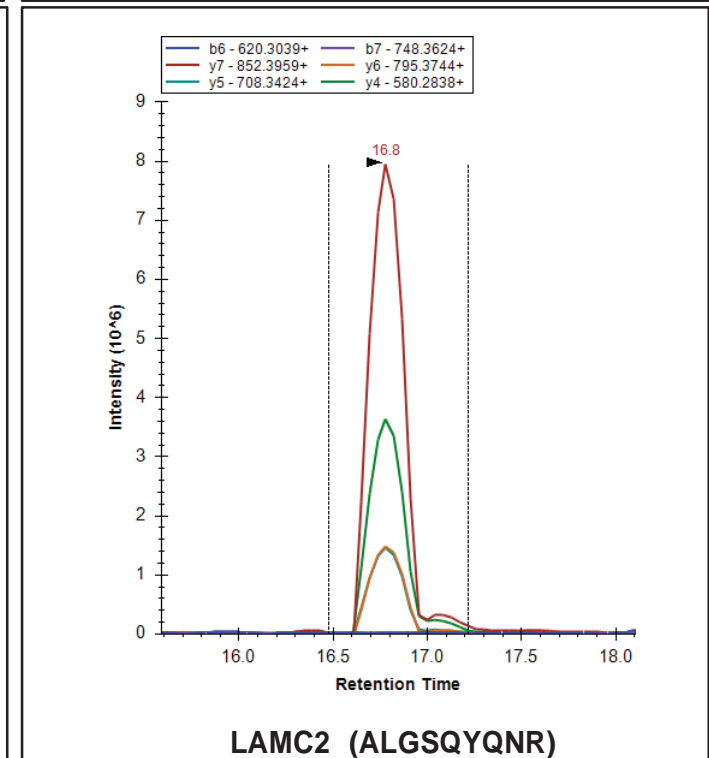

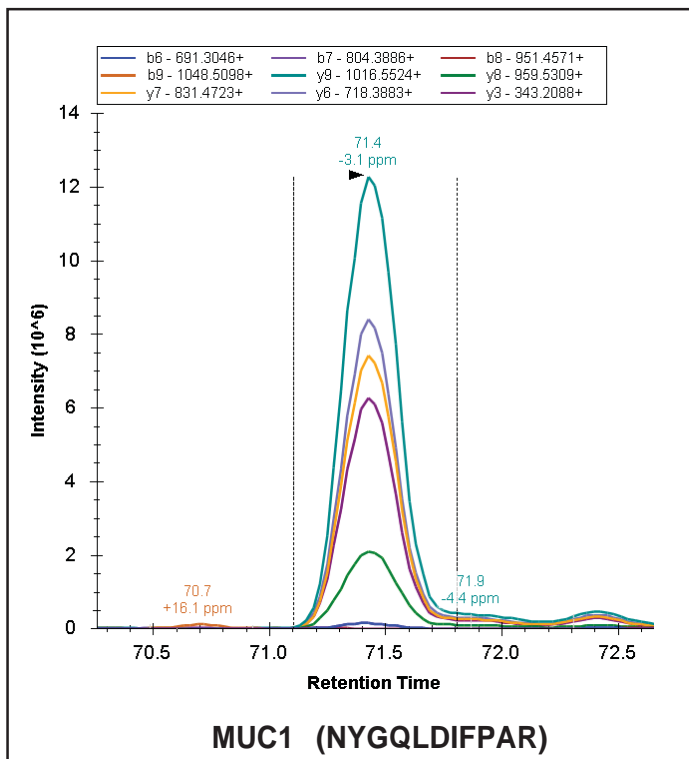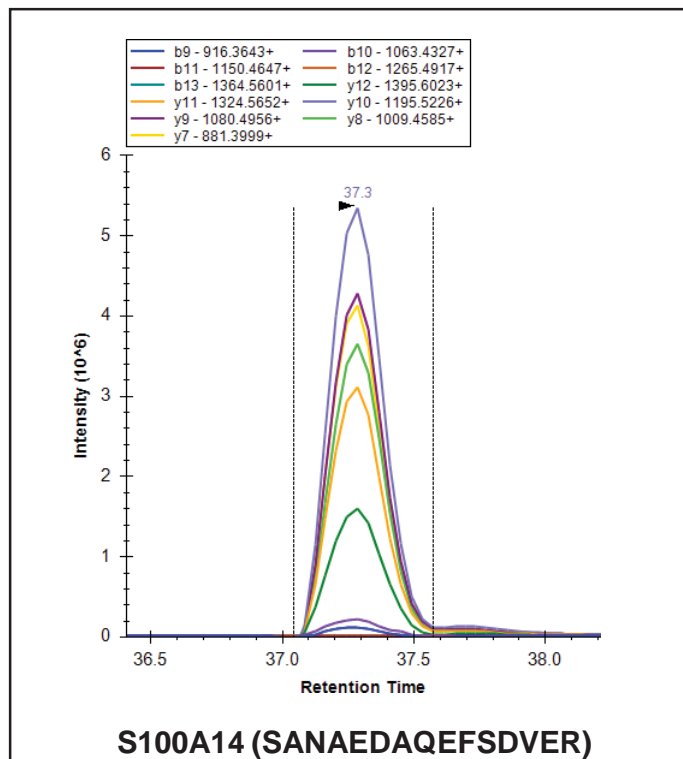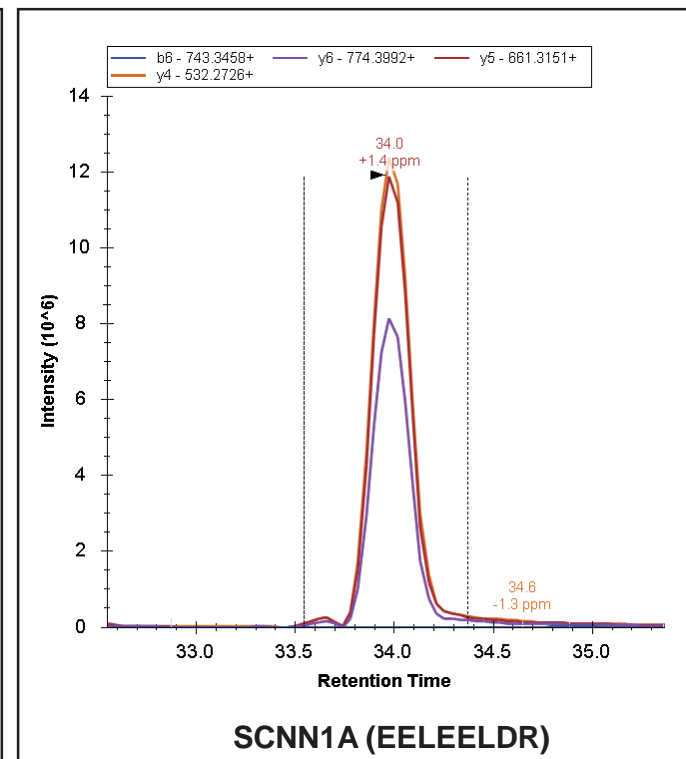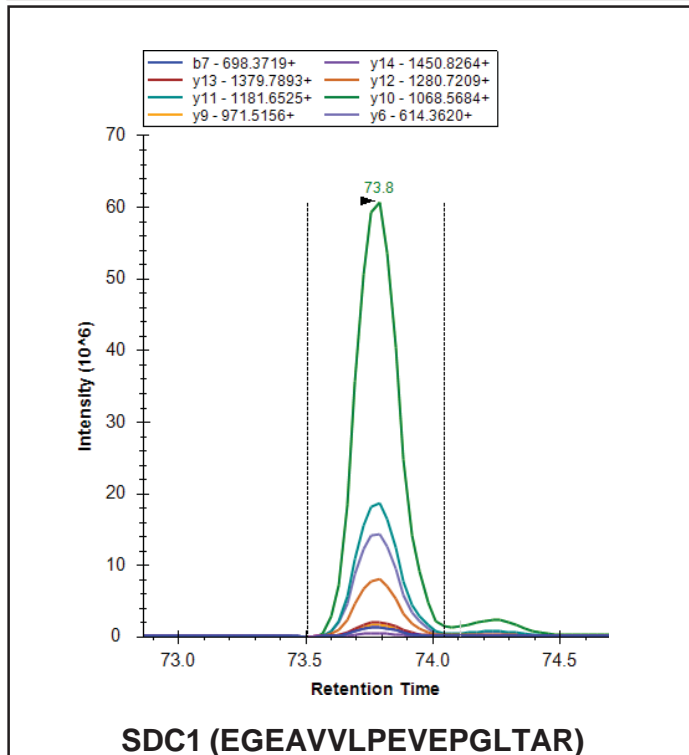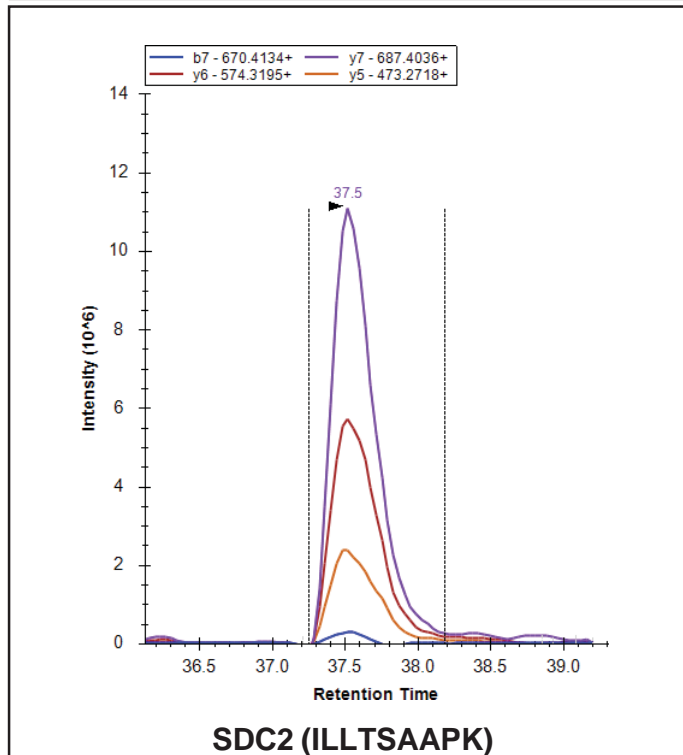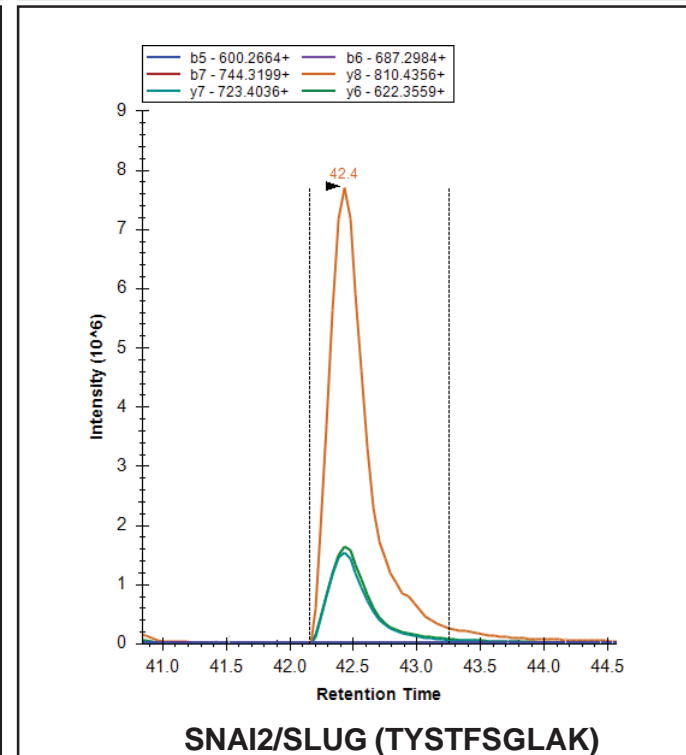

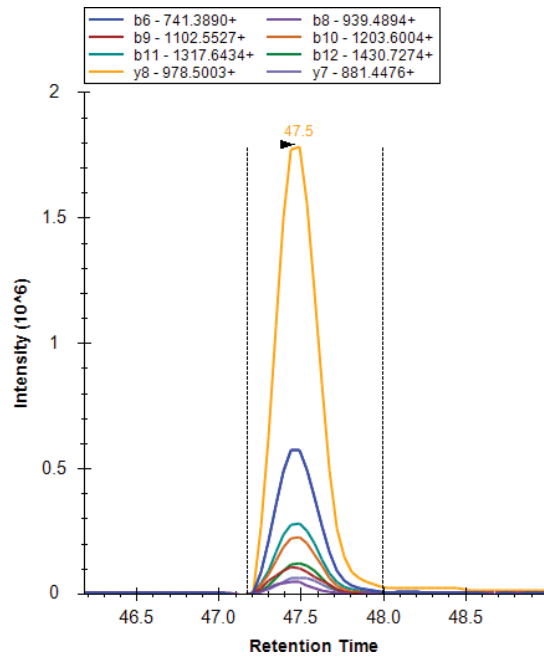

**TUBA (NLDIERPTYTNLNR)**

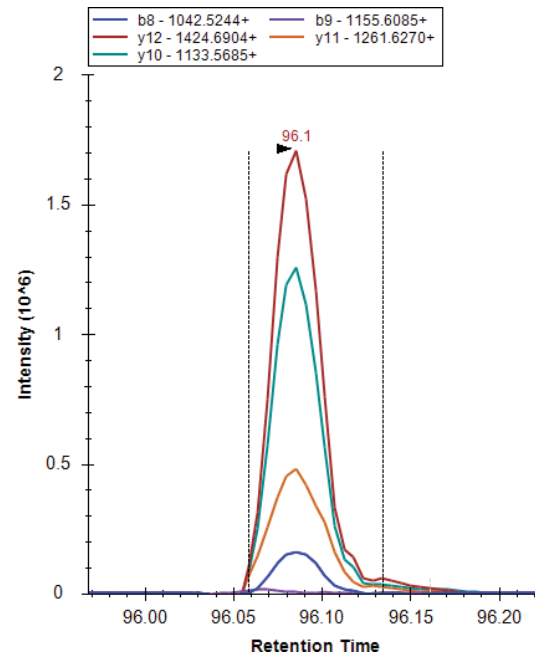

**TWIST1 (YIDFLYQVLQSDLEDSK)**

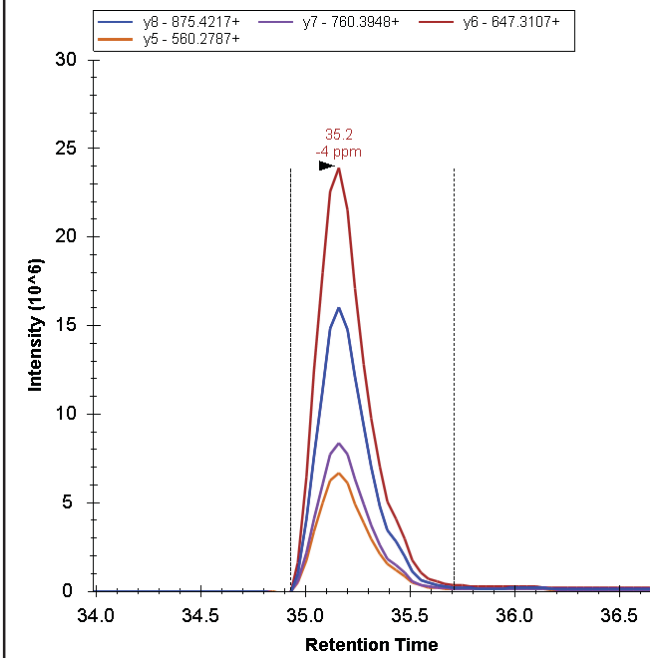

**VIM (FADLSEAANR)**

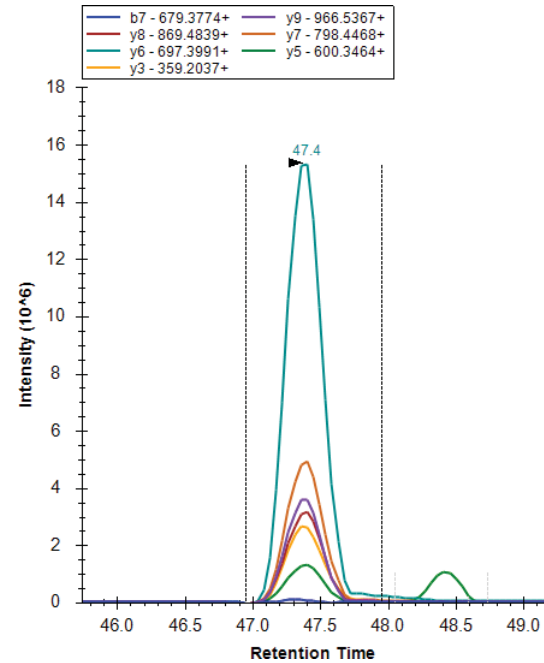

**WIPF1 (ALPATPQLPSR)**

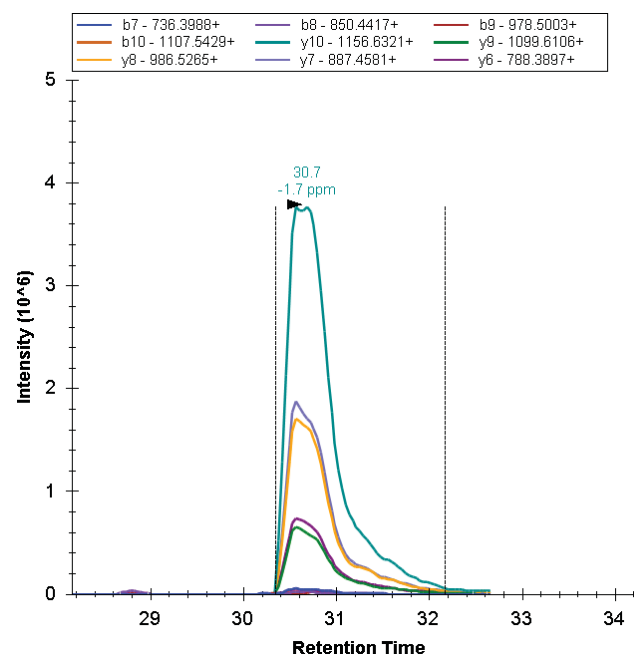

**XBP1 (THGLVVENQELR)**

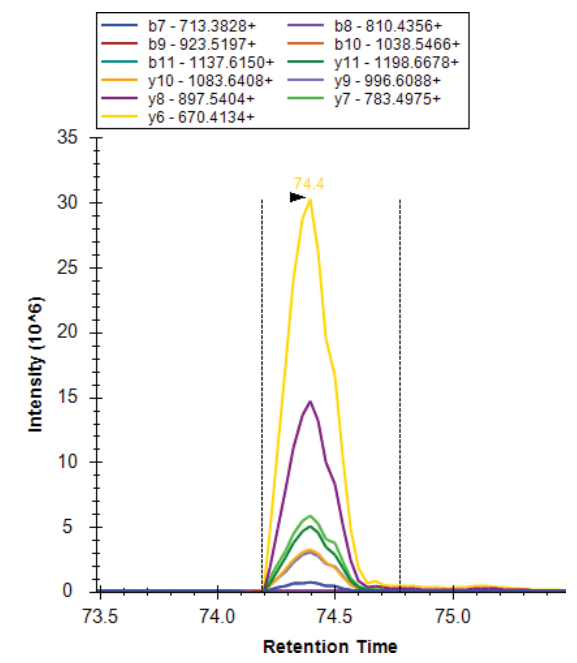

**ZEB1 (IADSVNLPLDVVK)**

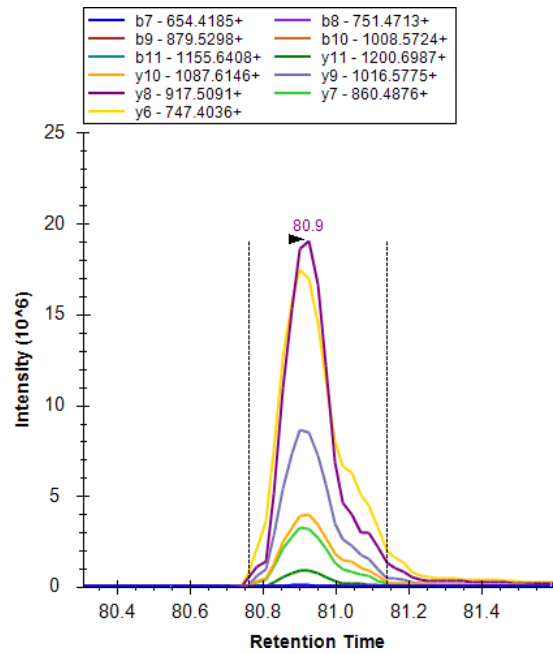

**ZEB2 (ISIAVGLPQEFVK)**

Supplementary Fig. 3 Calibration curve for 31 peptides precursors selected for monitoring protein expression across cell lines

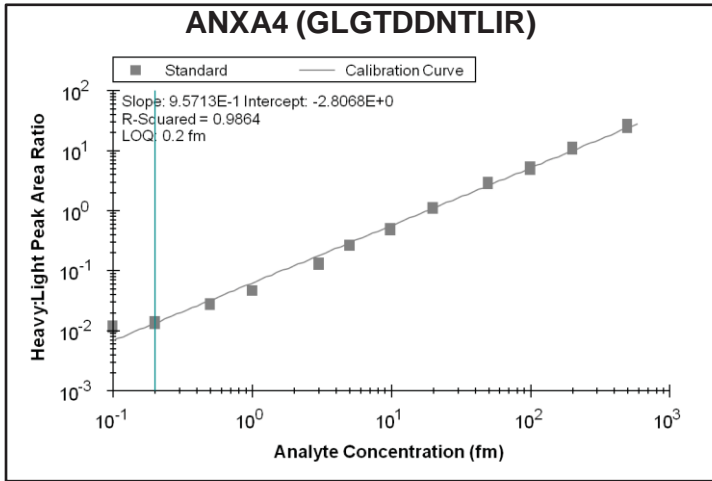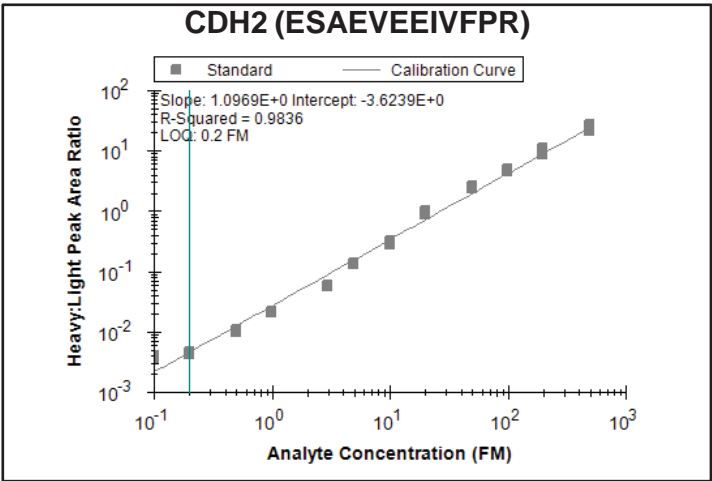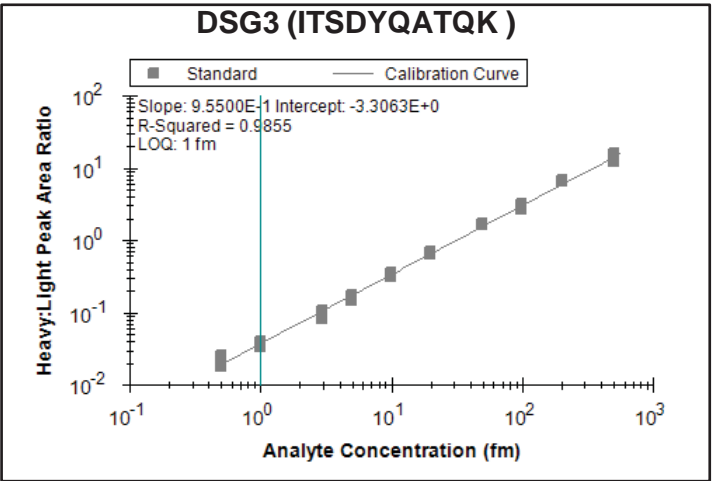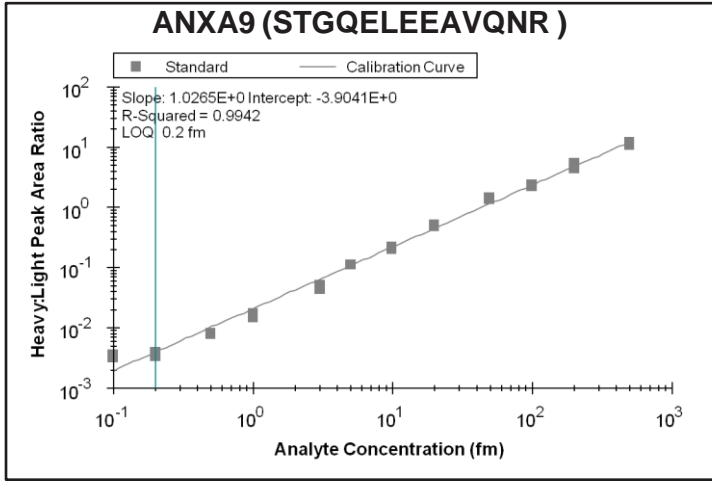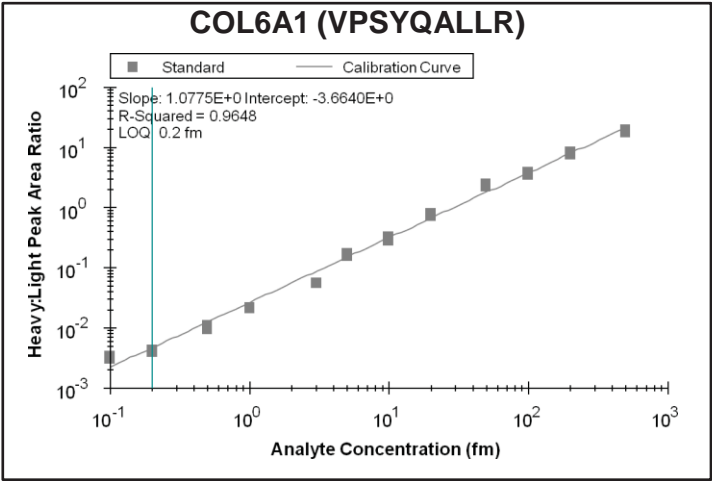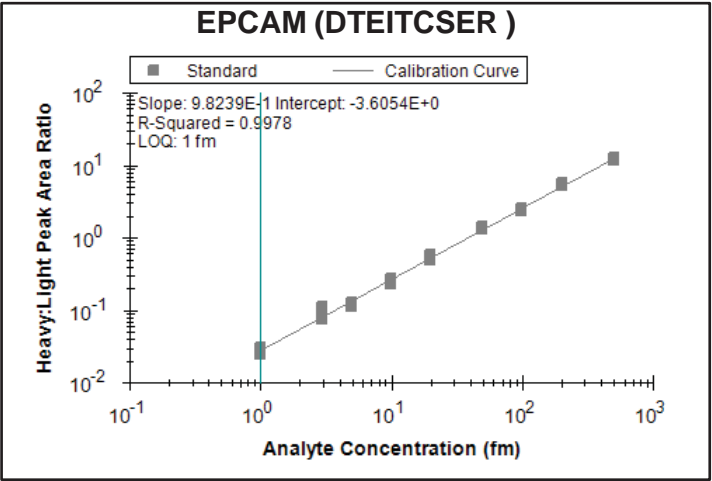



### CDH1 (VNFEDCTGR)

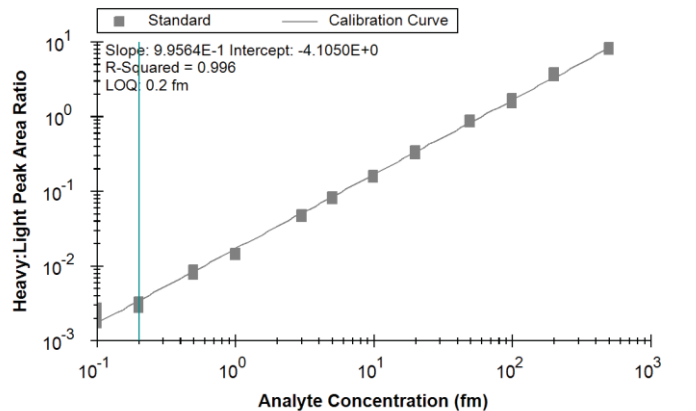

### DSG2 (DTGEIYTTSVTLDR)

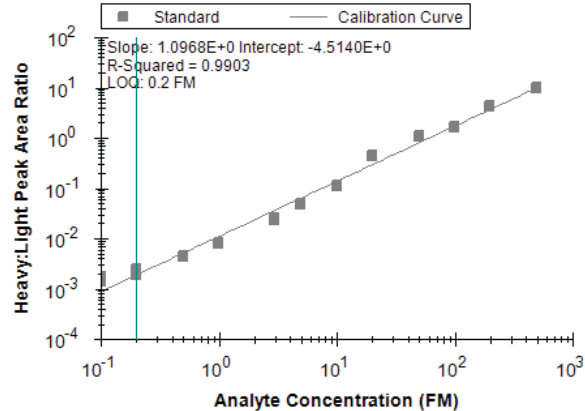

### EVI2A (NQNENINTNPITPEVDYK)

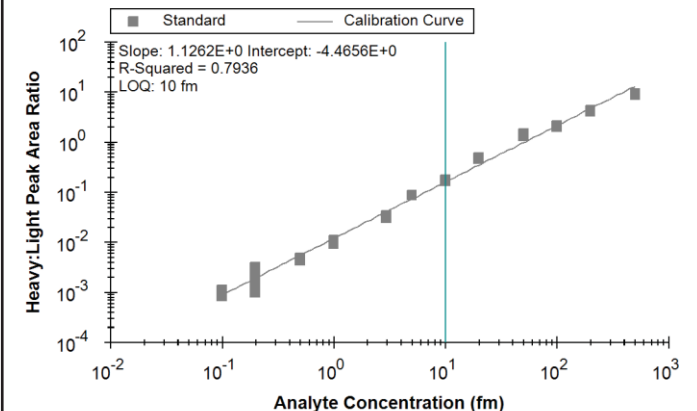

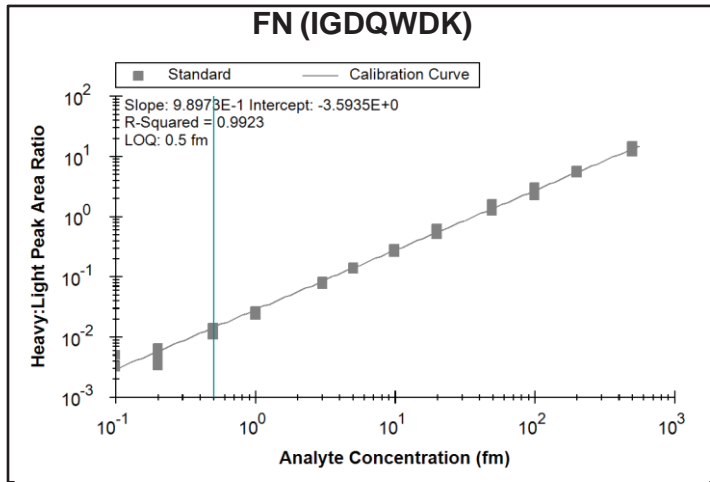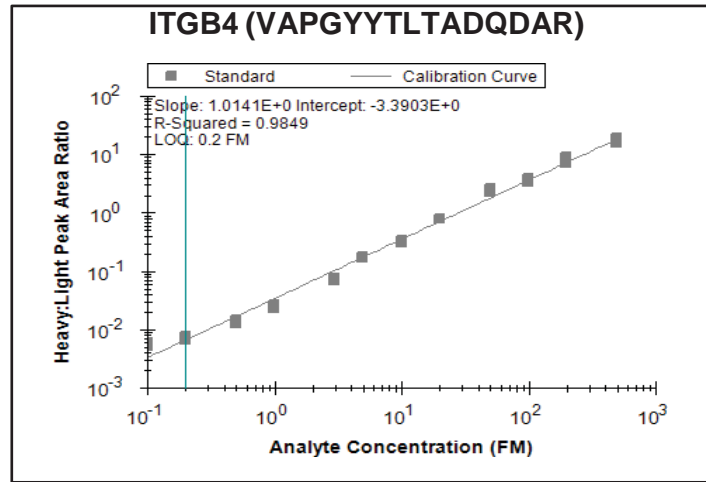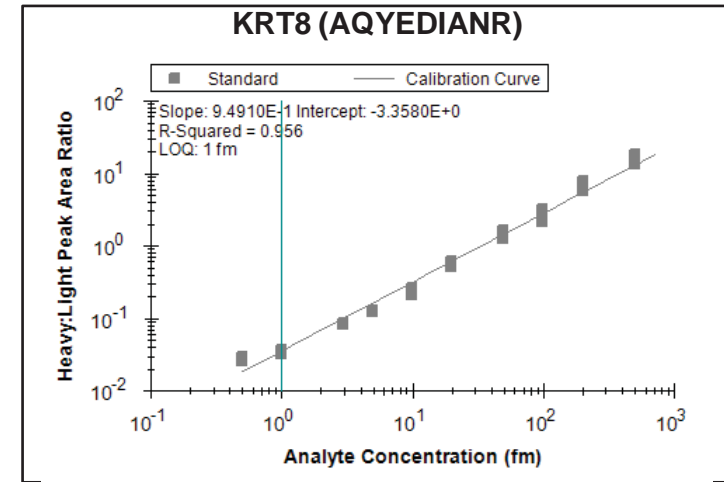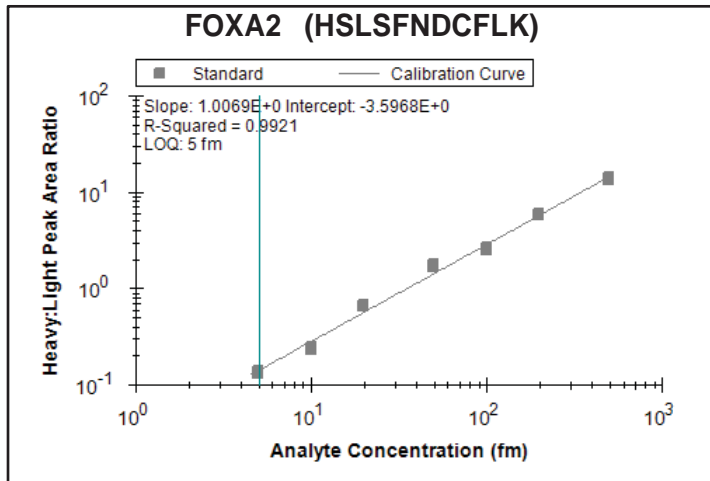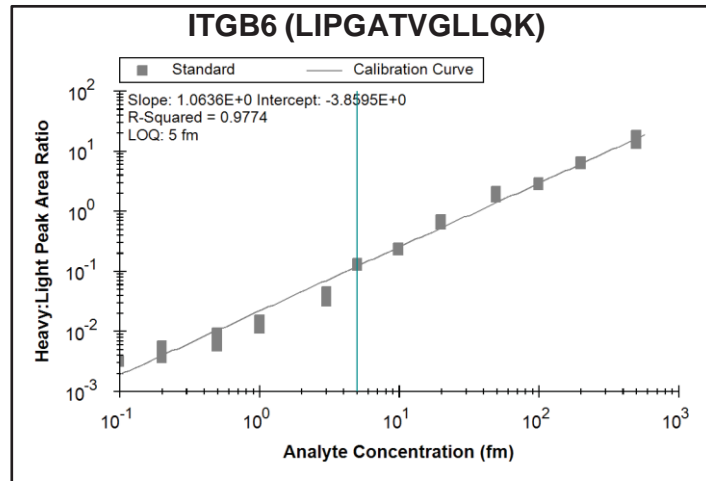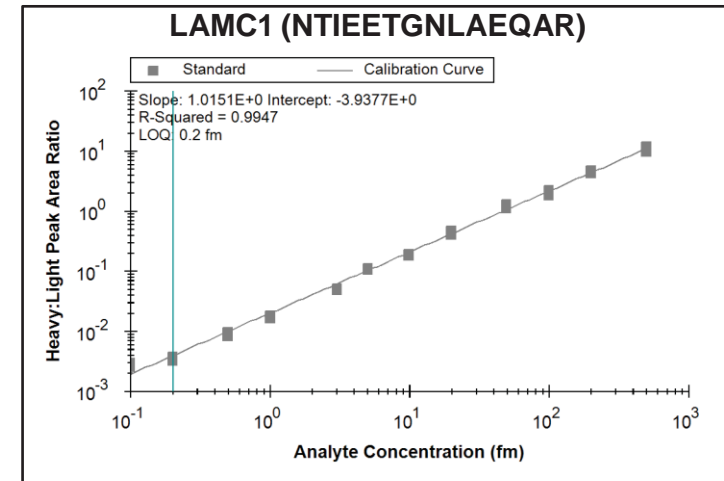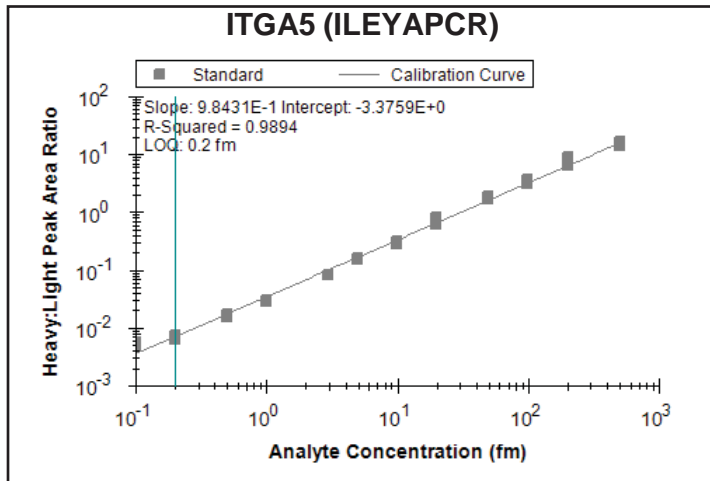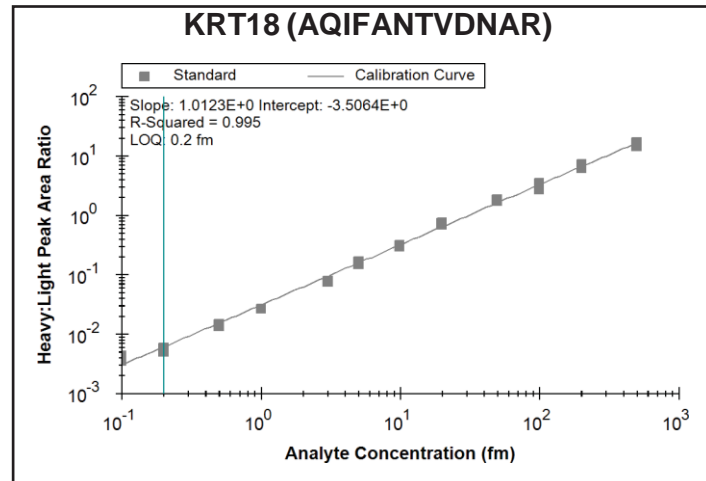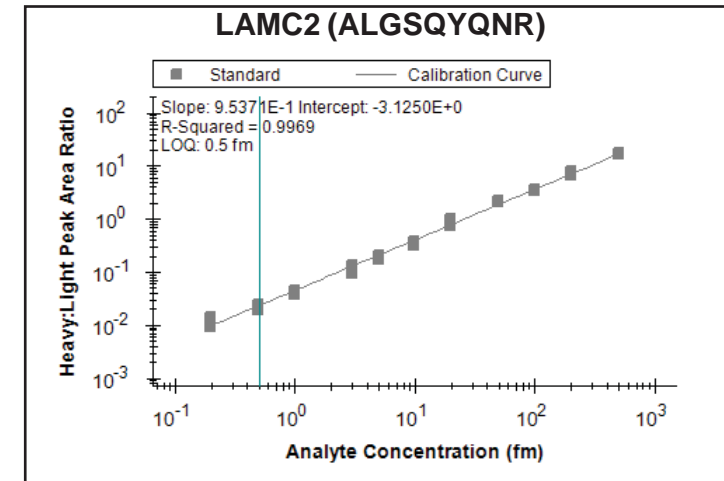

### MUC1 (NYGQLDIFPAR)

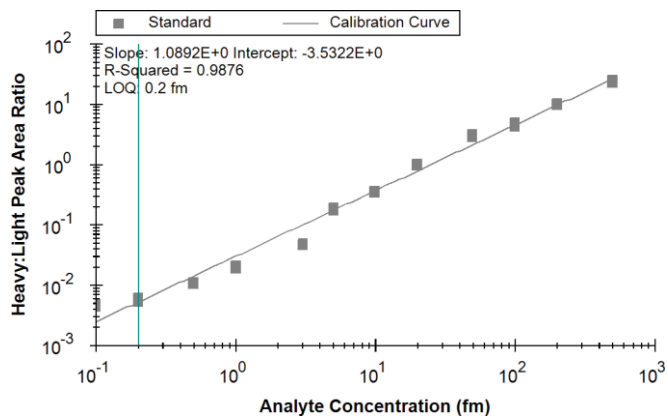

### SDC1 (EGEAVVLPEVEPGLTAR)

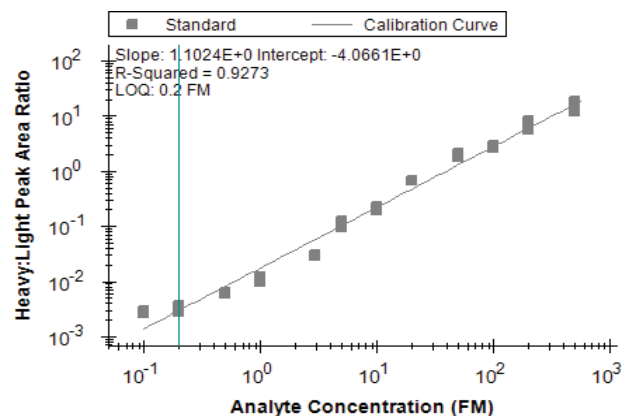

### TUBA (NLDIERPTYTNLNR)

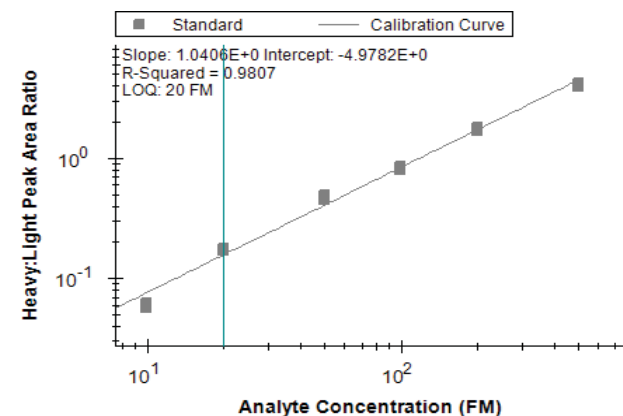

### S100A14 (SANAEDAQEFSDVER)

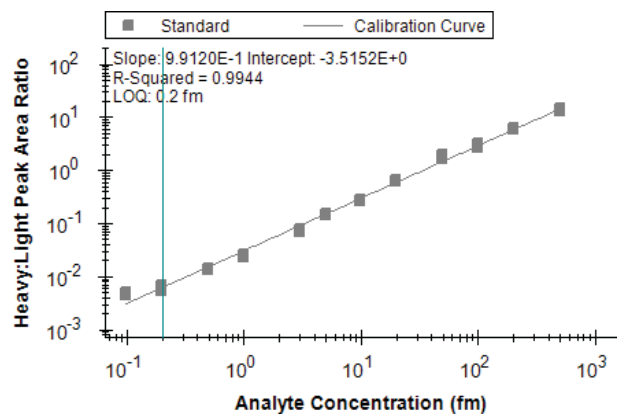

### SDC2 (ILLTSAAPK)

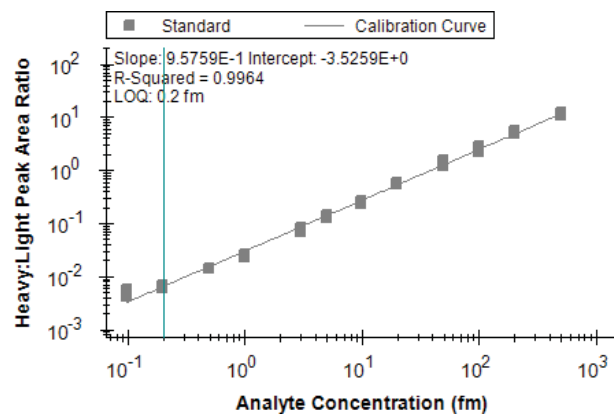

### TWIST1 (YIDFLYQVLQSELDK)

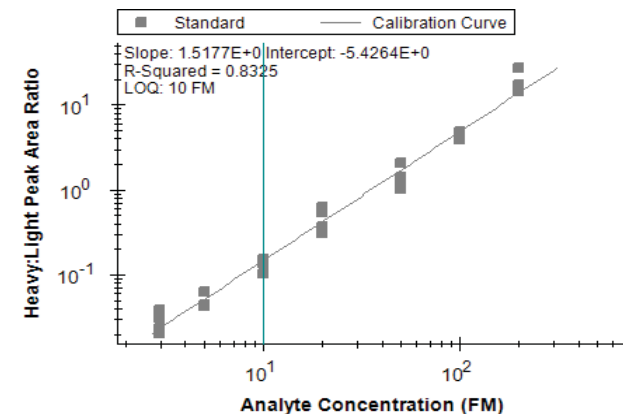

### SCNN1A (EELEELDR)

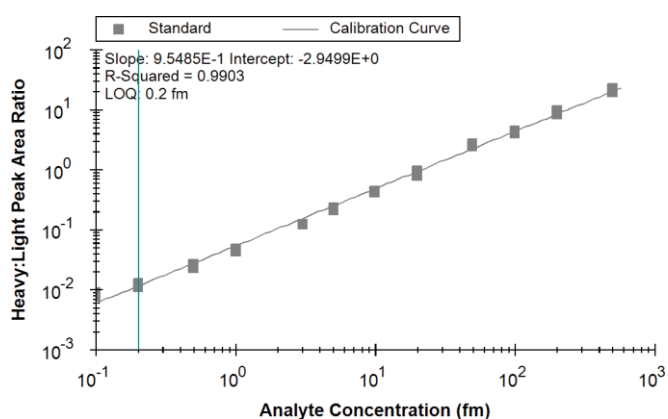

### SNAI2/SLUG (TYSTFGLAK)

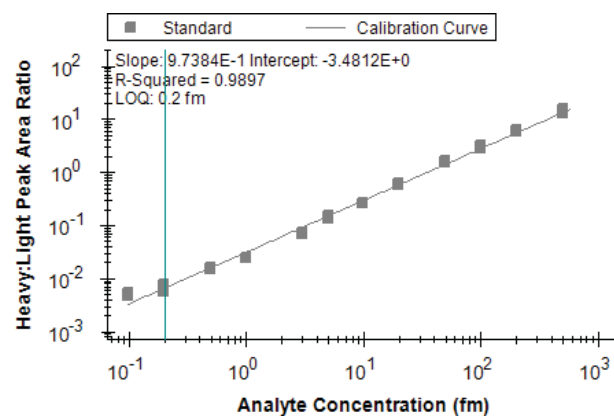

### VIM (FADLSEAANR)

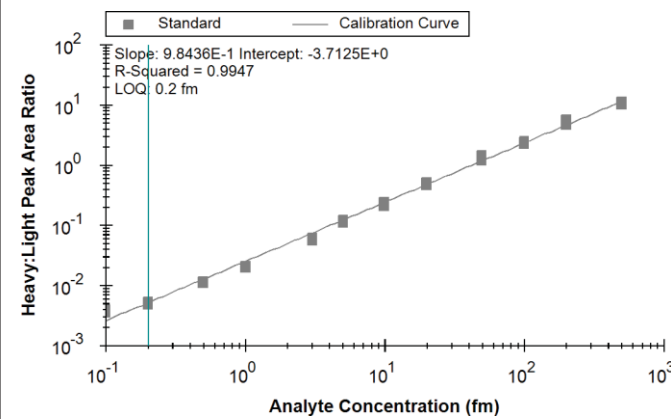

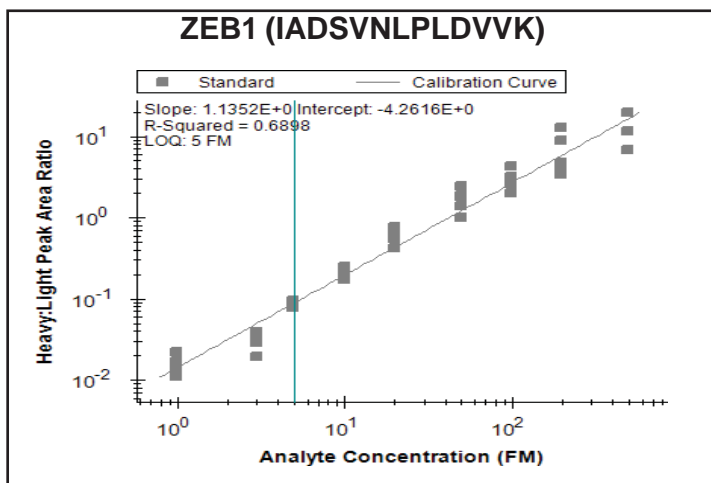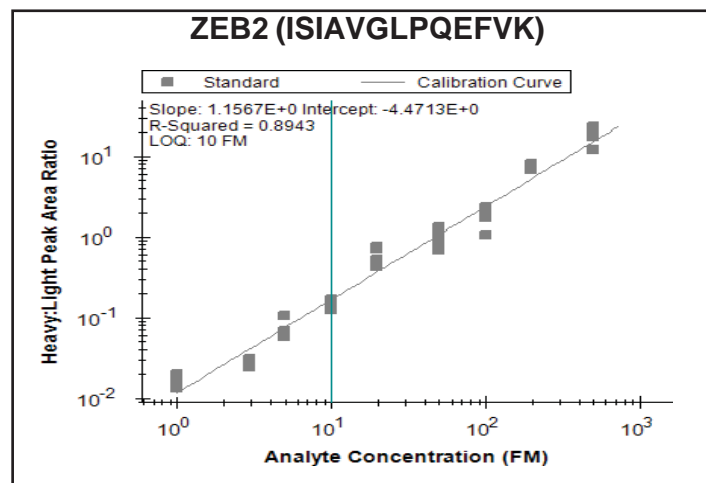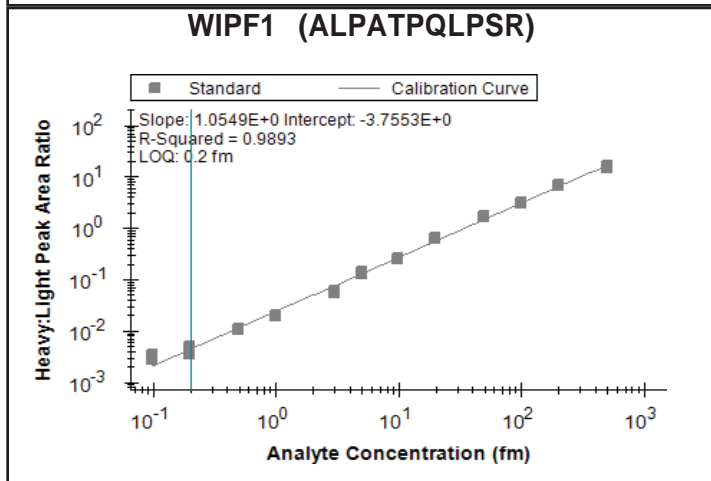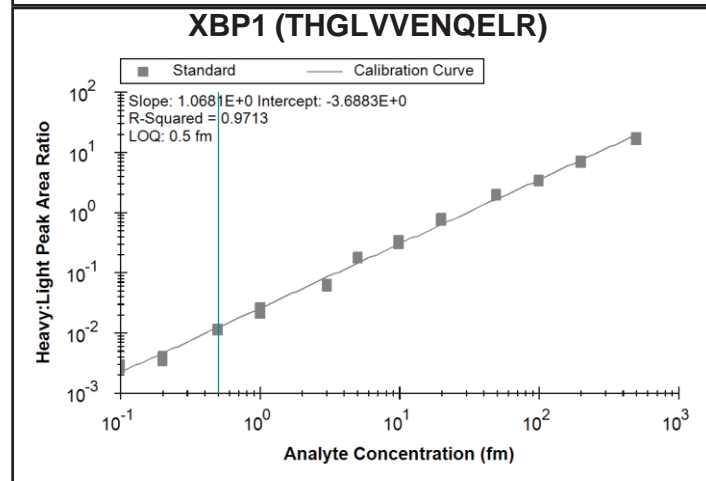

**Supplementary Fig. 4** Co-relation plots for mRNA-based gene expression and protein expression for values for depicted cell lines based on transcriptomics and reversed phase protein array (RPPA) proteomics data from CCLE database

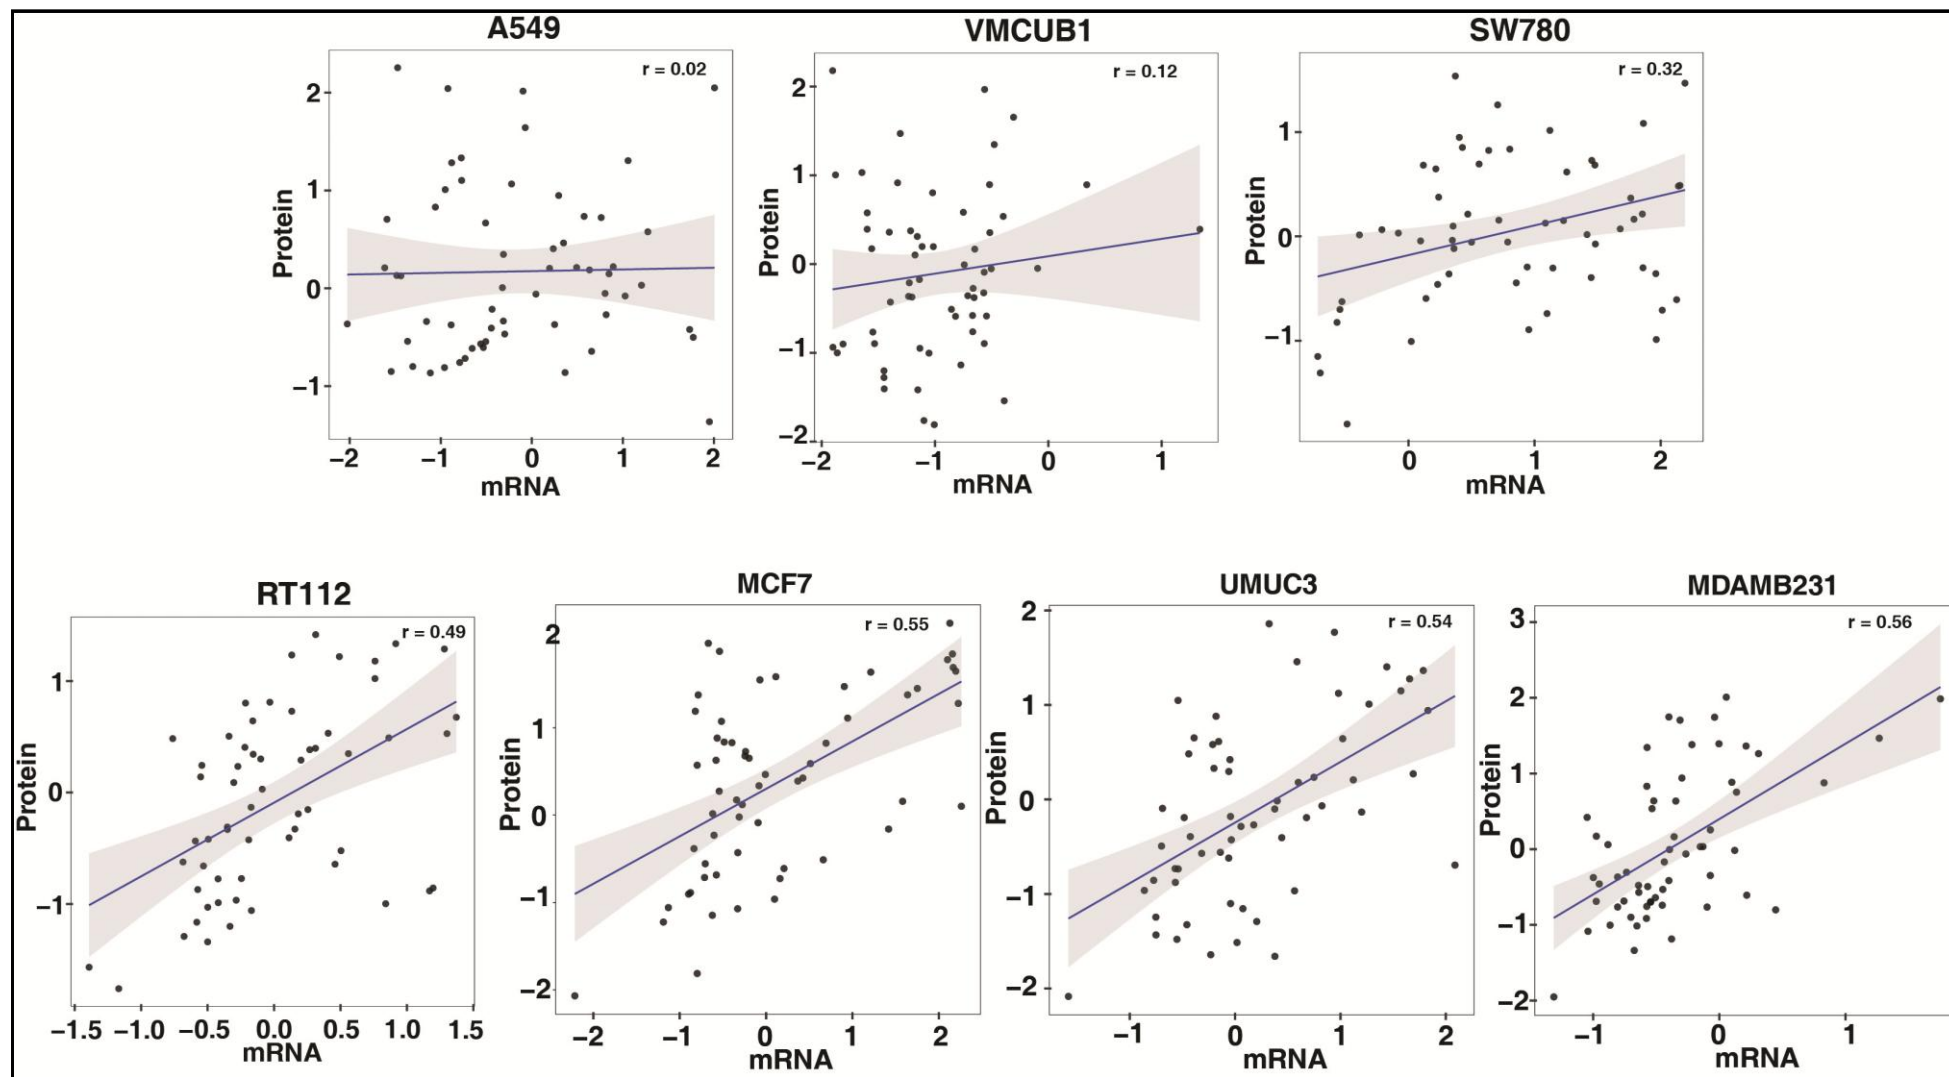

### Supplementary Method 1: The overview of all the cell lines used in the study along with the tissue of origin and culture method

| Cell line | Tissue of origin | Culture Conditions                                                                                                                                                        |
|-----------|------------------|---------------------------------------------------------------------------------------------------------------------------------------------------------------------------|
| VMUC1     | BLADDER          | Dulbecco's Modified Eagle Medium (DMEM) with fetal bovine serum (FBS) to a final concentration of 10% (adapted inhouse culture method)                                    |
| RT112     | BLADDER          | Dulbecco's Modified Eagle Medium (DMEM) with fetal bovine serum (FBS) to a final concentration of 10% (adapted inhouse culture method)                                    |
| SW780     | BLADDER          | Dulbecco's Modified Eagle Medium (DMEM) with fetal bovine serum (FBS) to a final concentration of 10% (adapted inhouse culture method)                                    |
| J82       | BLADDER          | Dulbecco's Modified Eagle Medium (DMEM) with fetal bovine serum (FBS) to a final concentration of 10% (adapted inhouse culture method)                                    |
| UMUC3     | BLADDER          | Dulbecco's Modified Eagle Medium (DMEM) with fetal bovine serum (FBS) to a final concentration of 10% (adapted inhouse culture method)                                    |
| HeLa      | CERVIX           | Dulbecco's Modified Eagle Medium (DMEM) low glucose with fetal bovine serum (FBS) to a final concentration of 5% (adapted inhouse culture method)                         |
| SiHa      | CERVIX           | Eagle's Minimum Essential Medium with fetal bovine serum (FBS) to a final concentration of 10% (ATCC culture method)                                                      |
| CaL27     | ORAL             | Dulbecco's Modified Eagle Medium (DMEM) with fetal bovine serum (FBS) to a final concentration of 10% (adapted inhouse culture method)                                    |
| FaDu      | ORAL             | Eagle's Minimum Essential Medium with fetal bovine serum (FBS) to a final concentration of 10% (ATCC culture method)                                                      |
| TE1       | ESOPHAGEAL       | Dulbecco's Modified Eagle Medium (DMEM) with fetal bovine serum (FBS) to a final concentration of 10% (adapted inhouse culture method)                                    |
| H358      | LUNG             | RPMI-1640 Medium with 10% fetal bovine serum (FBS) to a final concentration of 10% (ATCC culture method)                                                                  |
| A549      | LUNG             | Dulbecco's Modified Eagle Medium F-12 (DMEM F-12) with fetal bovine serum (FBS) to a final concentration of 10% (adapted inhouse culture method)                          |
| MCF7      | BREAST           | Dulbecco's Modified Eagle Medium (DMEM) low glucose with fetal bovine serum (FBS) to a final concentration of 5% (adapted inhouse culture method)                         |
| MDAMB231  | BREAST           | Dulbecco's Modified Eagle Medium (DMEM) with fetal bovine serum (FBS) to a final concentration of 10% (adapted inhouse culture method)                                    |
| AGS       | GASTRIC          | F-12K Medium with fetal bovine serum (FBS) to a final concentration of 10% (ATCC culture method)                                                                          |
| G415      | GALL BLADDER     | Dulbecco's Modified Eagle Medium (DMEM) with fetal bovine serum (FBS) to a final concentration of 10% (adapted inhouse culture method)                                    |
| OCUG1     | GALL BLADDER     | Dulbecco's Modified Eagle Medium (DMEM) with fetal bovine serum (FBS) to a final concentration of 10% (adapted inhouse culture method)                                    |
| NOZ       | GALL BLADDER     | Dulbecco's Modified Eagle Medium (DMEM) high glucose and low glucose (1:1) with fetal bovine serum (FBS) to a final concentration of 10% (adapted inhouse culture method) |
